# Supplementary material
Source: Springer Nature journal article supplement (https://www.springermedizin.de/resource/supplementary/12889_2013_6632_MOESM5_ESM.pdf/9498648)
Supplement: MOESM5 [file 9498648]

**Table 2. Frequency of Studies Addressing Communication and Preparedness Outcomes**

| <b>Communication outcomes</b>    | <b>Definition</b>                                                                                                                                                               | <b>Frequency (%)</b> | <b>Examples</b>                                                                                                                   |
|----------------------------------|---------------------------------------------------------------------------------------------------------------------------------------------------------------------------------|----------------------|-----------------------------------------------------------------------------------------------------------------------------------|
| Information sources and exposure | The incidental exposure of information of a public health threat, which is not actively looked for by the audience, but obtained through daily routine or from the surrounding. | (46) 50%             | Information about government's social distancing recommendations learned from routine television watching                         |
| Information seeking behaviors    | The actions people take proactively to search for information about public health threats for self-protection and survival.                                                     | (10) 11%             | Browsed website and/or call doctors to get info about vaccine against H1N1.                                                       |
| Trust and credibility            | Trust and credibility in the information sources, quality of the information received, fairness of treatment, or government's ability to respond to a public health emergency.  | (29) 32%             | Trust in commercial television or health department as information source about H1N1 vaccines.                                    |
| Information processing           | Ability to understand information about public health threats for self-protection and survival.                                                                                 | (3) 3%               | Some subgroups in society were more vulnerable during pandemics because they had difficulty in understanding preventive measures. |
| Information utilization          | Ability and/or willingness to use information obtained to prepare for and respond to public health threats.                                                                     | (11) 12%             | Compliance with hygienic practices during pandemics.                                                                              |
| <b>Preparedness outcomes</b>     | <b>Definition</b>                                                                                                                                                               | <b>Frequency (%)</b> | <b>Examples</b>                                                                                                                   |
| Knowledge/awareness              | Knowledge about specific threats and preventive behaviors                                                                                                                       | 49 (53%)             | Individuals with knowledge of a particular mode of transmission for H1N1.                                                         |
| Risk perception                  | Subjective judgment about the characteristics and severity of personal or societal risk                                                                                         | 64 (70%)             | The risk of being infected with the H1N1 virus.                                                                                   |
| Preventive behaviors             | Any activity undertaken by individuals to prevent a disease or limit contagion to other people.                                                                                 | 64 (70%)             | Compliance with the hygienic practices, immunization practices.                                                                   |
| Healthcare behaviors             | Any activity undertaken by individuals to seek medical attention after they encounter the threat                                                                                | 24 (26%)             | Seeking health care, compliance with recommended medications (i.e. antivirals).                                                   |
| Emotional Response               | Emotional reactions that                                                                                                                                                        | 43 (47%)             | Fear, worry, anxiety,                                                                                                             |

|  |                                                                                  |  |                       |
|--|----------------------------------------------------------------------------------|--|-----------------------|
|  | occur as a response to a real risk or potential threat to health or environment. |  | hopelessness or anger |
|--|----------------------------------------------------------------------------------|--|-----------------------|
